# Supplementary material for: Conformation of a natural polyelectrolyte in semidilute solutions with no added salt
Source: Royal Society of Chemistry journal article supplement (doi:10.1039/c2sm25733e), 2012-01-01
Supplement: c2sm25733e.pdf [file c2sm25733e.pdf]

### Supplementary Data

| <b>LD</b>           |              |               |          |                               |            |                      |             |
|---------------------|--------------|---------------|----------|-------------------------------|------------|----------------------|-------------|
| <b>C</b><br>[mg/mL] | <b>b</b> [Å] | <b>ξe</b> [Å] | <b>β</b> | <b>K</b> ( $\times 10^{-3}$ ) | <b>SSE</b> | <b>R<sup>2</sup></b> | <b>RMSE</b> |
| 4                   | -----        |               |          |                               |            |                      |             |
| 6                   | -----        |               |          |                               |            |                      |             |
| 8                   | 36.5±1.5     | 35.3±0.6      | 15.7±0.8 | 29.7±0.3                      | 0.6361     | 0.9901               | 0.0521      |
| 10                  | 33.4±1.3     | 33.5±0.6      | 15.4±0.8 | 33.5±0.3                      | 0.6811     | 0.9893               | 0.0540      |
| 15                  | 28.8±1.2     | 27.9±0.4      | 14.8±0.6 | 49.6±0.6                      | 0.7809     | 0.9838               | 0.0578      |
| 20                  | 24.1±1.1     | 24.8±0.4      | 14.2±0.6 | 59.5±0.9                      | 0.8940     | 0.9795               | 0.0618      |
| 25                  | 20.6±1.1     | 22.5±0.4      | 13.7±0.6 | 68.5±1.5                      | 1.2666     | 0.9677               | 0.0736      |
| 30                  | 24.3±1.6     | 21.3±0.4      | 11.9±0.6 | 90.9±1.7                      | 1.4177     | 0.9563               | 0.0778      |

| <b>HF</b>           |              |               |          |                               |            |                      |             |
|---------------------|--------------|---------------|----------|-------------------------------|------------|----------------------|-------------|
| <b>C</b><br>[mg/mL] | <b>b</b> [Å] | <b>ξe</b> [Å] | <b>β</b> | <b>K</b> ( $\times 10^{-3}$ ) | <b>SSE</b> | <b>R<sup>2</sup></b> | <b>RMSE</b> |
| 4                   | -----        |               |          |                               |            |                      |             |
| 6                   | 53.9±3.7     | 42.8±1.1      | 13.8±1.1 | 19.9±0.2                      | 0.6734     | 0.9906               | 0.0536      |
| 8                   | 40.7±2.2     | 38.0±0.8      | 14.6±1.0 | 22.9±0.2                      | 0.8342     | 0.9882               | 0.0597      |
| 10                  | 34.3±1.4     | 34.5±0.5      | 16.0±0.7 | 33.8±0.4                      | 0.4102     | 0.9887               | 0.0476      |
| 15                  | 28.1±1.2     | 28.6±0.4      | 15.6±0.6 | 38.5±0.5                      | 0.7167     | 0.9860               | 0.0553      |
| 20                  | 22.9±1.1     | 25.8±0.4      | 16.3±0.7 | 45.3±0.8                      | 1.0025     | 0.9781               | 0.0655      |
| 25                  | 19.5±1.2     | 23.2±0.4      | 16.3±0.8 | 54.1±1.5                      | 1.5232     | 0.9600               | 0.0807      |
| 30                  | 21.8±1.3     | 22.3±0.3      | 14.4±0.6 | 62.0±1.3                      | 1.2561     | 0.9629               | 0.0733      |

| <b>LF</b>           |              |               |           |                               |            |                      |             |
|---------------------|--------------|---------------|-----------|-------------------------------|------------|----------------------|-------------|
| <b>C</b><br>[mg/mL] | <b>b</b> [Å] | <b>ξe</b> [Å] | <b>β</b>  | <b>K</b> ( $\times 10^{-3}$ ) | <b>SSE</b> | <b>R<sup>2</sup></b> | <b>RMSE</b> |
| 3                   | 95.6±24.2    | 68.8±8.2      | 21.6±11.6 | 12.1±0.2                      | 2.5817     | 0.9718               | 0.1050      |
| 4                   | 73.5±9.8     | 53.5±3.0      | 13.5±2.5  | 16.2±0.2                      | 1.2433     | 0.9847               | 0.0729      |
| 6                   | 46.0±2.5     | 42.8±1.0      | 18.0±1.4  | 24.7±0.2                      | 0.7961     | 0.9892               | 0.0583      |
| 8                   | 39.7±1.9     | 39.6±0.8      | 19.1±1.3  | 27.2±0.3                      | 0.8212     | 0.9882               | 0.0592      |
| 10                  | 33.2±1.3     | 36.3±0.5      | 19.8±0.9  | 31.4±0.4                      | 0.4545     | 0.9881               | 0.0501      |
| 15                  | 29.9±1.5     | 30.2±0.5      | 19.4±1.0  | 47.3±0.6                      | 1.0429     | 0.9787               | 0.0668      |
| 20                  | 25.2±1.4     | 27.1±0.5      | 19.7±1.0  | 59.9±1.1                      | 1.4721     | 0.9655               | 0.0793      |
| 25                  | 23.4±1.3     | 22.9±0.4      | 16.4±0.8  | 79.8±1.5                      | 1.2348     | 0.9599               | 0.0736      |
| 30                  | 22.5±1.8     | 23.2±0.5      | 19.3±1.2  | 85.0±2.3                      | 2.5128     | 0.9157               | 0.1036      |

Table S1. Fit parameters for the Semiflexible model (method iii) with electrostatic structure factor (eq 7)

| <b>LD</b>           |              |             |           |                               |            |                      |             |
|---------------------|--------------|-------------|-----------|-------------------------------|------------|----------------------|-------------|
| <b>C</b><br>[mg/mL] | <b>b</b> [Å] | $\xi_P$ [Å] | $\beta$   | <b>K</b> ( $\times 10^{-3}$ ) | <b>SSE</b> | <b>R<sup>2</sup></b> | <b>RMSE</b> |
| 4                   | -----        |             |           |                               |            |                      |             |
| 6                   | -----        |             |           |                               |            |                      |             |
| 8                   | 32.4±1.4     | 23.9±0.7    | 100.3±4.7 | 29.4±0.3                      | 0.5907     | 0.9908               | 0.0502      |
| 10                  | 29.0±1.1     | 22.0±0.6    | 95.1±3.9  | 33.0±0.3                      | 0.5274     | 0.9917               | 0.0475      |
| 15                  | 22.8±0.7     | 16.6±0.4    | 97.0±2.7  | 48.1±0.5                      | 0.3554     | 0.9926               | 0.0390      |
| 20                  | 18.2±0.8     | 13.9±0.3    | 89.4±2.8  | 56.0±1.0                      | 0.4574     | 0.9895               | 0.0442      |
| 25                  | 13.9±1.5     | 12.1±0.3    | 79.3±5.4  | 59.6±3.7                      | 0.4112     | 0.9895               | 0.0419      |
| 30                  | 14.1±1.6     | 10.4±0.3    | 80.4±5.5  | 78.1±4.8                      | 0.4874     | 0.9850               | 0.0456      |

| <b>HF</b>           |              |             |          |                               |            |                      |             |
|---------------------|--------------|-------------|----------|-------------------------------|------------|----------------------|-------------|
| <b>C</b><br>[mg/mL] | <b>b</b> [Å] | $\xi_P$ [Å] | $\beta$  | <b>K</b> ( $\times 10^{-3}$ ) | <b>SSE</b> | <b>R<sup>2</sup></b> | <b>RMSE</b> |
| 4                   | -----        |             |          |                               |            |                      |             |
| 6                   | 47.2±3.2     | 30.8±1.4    | 96.3±7.6 | 24.8±0.2                      | 0.7154     | 0.9900               | 0.0553      |
| 8                   | 36.0±1.9     | 26.1±1.0    | 92.9±5.9 | 28.5±0.3                      | 0.8103     | 0.9886               | 0.0588      |
| 10                  | 29.1±1.2     | 23.1±0.6    | 97.8±4.2 | 32.8±0.4                      | 0.4065     | 0.9904               | 0.0461      |
| 15                  | 23.0±0.7     | 17.6±0.4    | 98.8±2.8 | 47.0±0.5                      | 0.3709     | 0.9928               | 0.0398      |
| 20                  | 18.2±0.6     | 15.2±0.3    | 98.2±2.7 | 54.1±0.8                      | 0.3561     | 0.9922               | 0.0390      |
| 25                  | 13.7±1.3     | 13.1±0.2    | 91.0±5.5 | 59.5±3.3                      | 0.2601     | 0.9932               | 0.0333      |
| 30                  | 14.8±1.1     | 11.9±0.3    | 91.6±4.4 | 69.5±2.8                      | 0.4643     | 0.9863               | 0.0445      |

| <b>LF</b>           |              |             |             |                               |            |                      |             |
|---------------------|--------------|-------------|-------------|-------------------------------|------------|----------------------|-------------|
| <b>C</b><br>[mg/mL] | <b>b</b> [Å] | $\xi_P$ [Å] | $\beta$     | <b>K</b> ( $\times 10^{-3}$ ) | <b>SSE</b> | <b>R<sup>2</sup></b> | <b>RMSE</b> |
| 3                   | 93.1±24.3    | 59.0±9.9    | 167.2±102.7 | 12.1±0.2                      | 2.5938     | 0.9716               | 0.1053      |
| 4                   | 69.9±10.0    | 42.6±4.0    | 101.1±21.5  | 16.2±0.2                      | 1.2775     | 0.9843               | 0.0739      |
| 6                   | 41.9±2.3     | 31.3±1.2    | 114.4±8.5   | 24.5±0.2                      | 0.7703     | 0.9895               | 0.0574      |
| 8                   | 35.7±1.6     | 28.2±0.9    | 116.9±7.0   | 27.0±0.3                      | 0.7118     | 0.9898               | 0.0552      |
| 10                  | 28.7±1.0     | 25.2±0.5    | 114.1±4.6   | 30.5±0.4                      | 0.3458     | 0.9922               | 0.0425      |
| 15                  | 24.3±0.7     | 19.3±0.3    | 123.1±3.3   | 46.1±0.4                      | 0.3222     | 0.9934               | 0.0371      |
| 20                  | 19.7±0.5     | 16.6±0.2    | 121.4±2.5   | 57.2±0.6                      | 0.2040     | 0.9952               | 0.0295      |
| 25                  | 17.0±0.5     | 13.8±0.2    | 126.9±2.4   | 74.0±0.9                      | 0.1602     | 0.9948               | 0.0262      |
| 30                  | 13.1±1.4     | 13.0±0.1    | 112.1±7.7   | 70.1±4.5                      | 0.1450     | 0.9951               | 0.0249      |

Table S2. Fit parameters for the Semiflexible model (method iii) with PRISM-based structure factor (eq 8)
